# Supplementary material for: Evaluation of the total distribution volume of 18F-FBPA in normal tissues of healthy volunteers by non-compartmental kinetic modeling
Source: PubMed Central journal article supplement (PMC7033086; doi:10.1007/s12149-019-01427-9), 2019-12-05

**Article title:** “Evaluation of the total distribution volume of  $^{18}\text{F}$ -FBPA in normal tissues of healthy volunteers by non-compartmental kinetic modeling”.

**Authors:** Victor Romanov., Kayako Isohashi., Galal Al-Obthani., Rouaa Beshr., Genki Horitsugi., Yasukazu Kanai., Sadahiro Naka., Tadashi Watabe., Eku Shimosegawa., Jun Hatazawa.

**Affiliation and address of the corresponding author:** Jun Hatazawa; Yamada Oka 2-2, Suita City, Osaka 565-0871, Japan; e-mail: hatazawa@tracer.med.osaka-u.ac.jp

**Journal name:** Annals of Nuclear Medicine (ANM).

**Online Resource1** Interpolated plasma activity curves for all subjects in kBq/ml, derived from the clearance data points of actual plasma activity with a bi-exponential model. Interpolated curve is colored in red, and actual plasma curve is colored in blue.

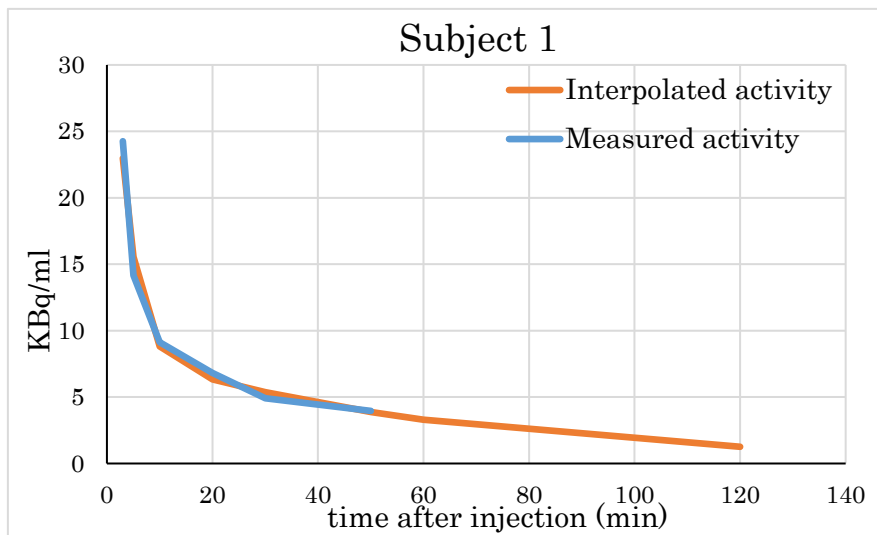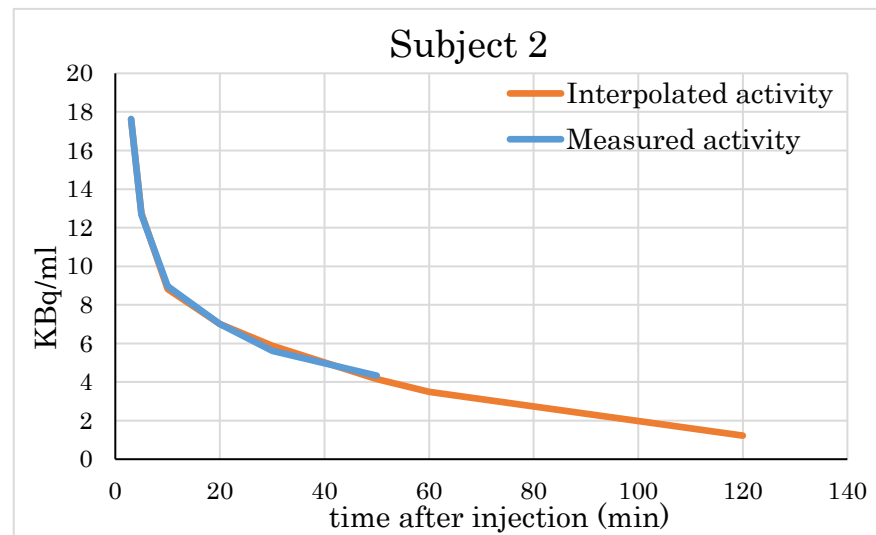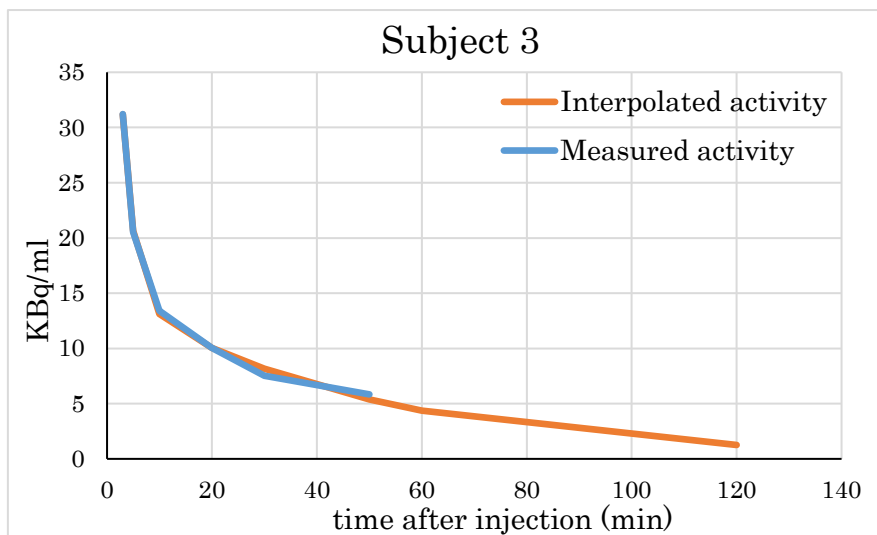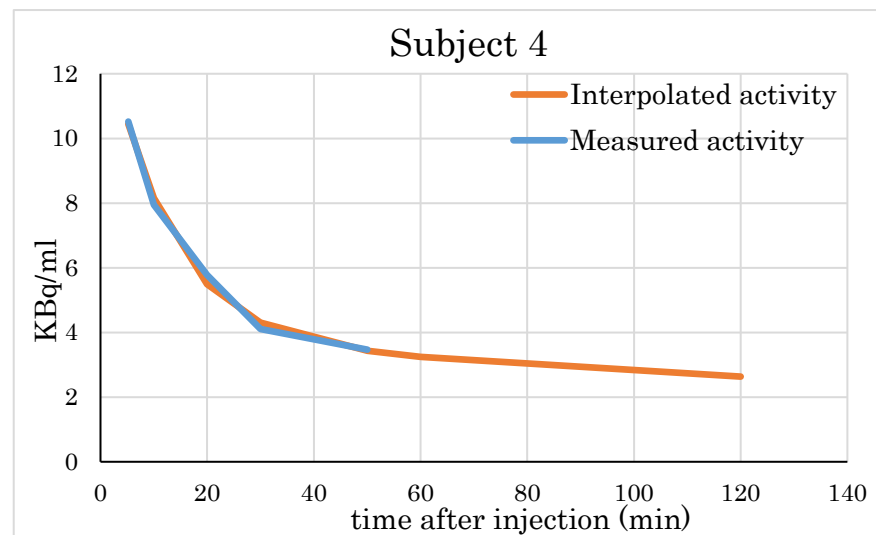

Subject 5

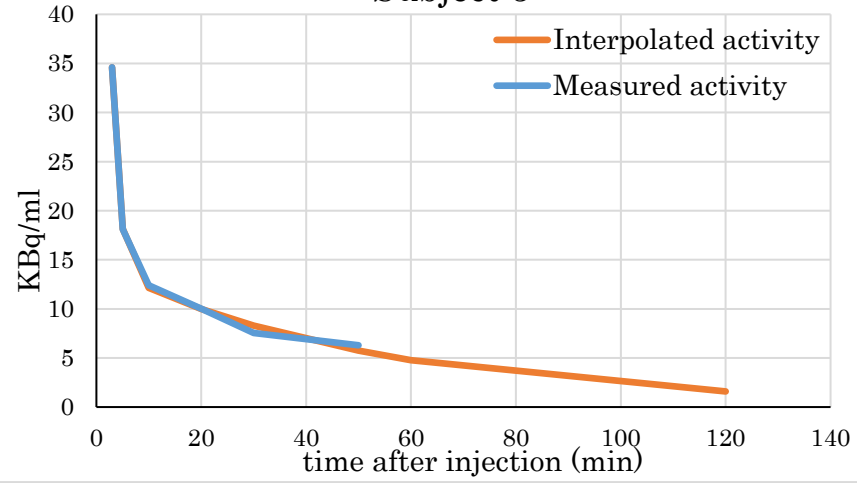

Subject 6

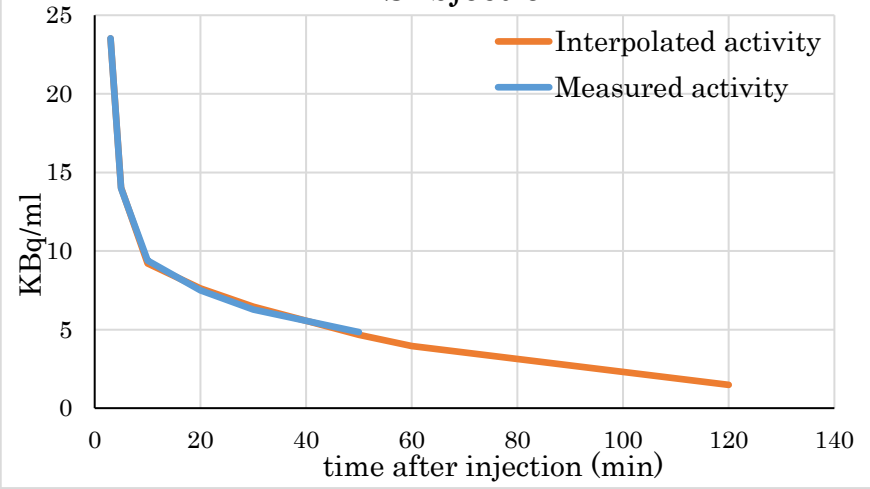

Supplement: 12149_2019_1427_MOESM1_ESM.pdf [file 12149_2019_1427_MOESM1_ESM.pdf]
